# Supplementary material
Source: publisher figshare collection journal article supplement (https://diabetesjournals.figshare.com/ndownloader/files/31573796)

# Polygenic prediction of type 2 diabetes in continental Africa

Tinashe Chikowore<sup>1,2</sup>, Kenneth Ekoru<sup>3</sup>, Marijana Vujkovic<sup>4</sup>, Dipender Gill<sup>5,12</sup>, Fraser Pirie<sup>6</sup>, Elizabeth Young<sup>7</sup>, Manjinder S Sandhu<sup>8</sup>, Mark McCarthy<sup>9</sup>, Charles Rotimi<sup>3</sup>, Adebawale Adeyemo<sup>3</sup>, Ayesha Motala<sup>6</sup> and Segun Fatumo<sup>10,11</sup>

## Supplementary Tables and Figures

**Supplementary Table 1 Descriptive Statistics of South Africa Zulu participants**

| Variables              | South African Zulu ( <i>n</i> = 2,583)<br>median (IQR) |
|------------------------|--------------------------------------------------------|
| Female, <i>n</i> (%)   | 1,906 (73.8)                                           |
| Age, years             | 52.0 (39.0-60.0)                                       |
| BMI, kg/m <sup>2</sup> | 31.4 (26.1-36.9)                                       |
| Height, m <sup>2</sup> | 1.60 (1.55-1.65)                                       |
| Weight, kg             | 80.0 (67.5-93.6)                                       |
| WHR                    | 0.92 (0.85-1.00)                                       |
| HC, cm                 | 109 (100-120)                                          |
| WC, cm                 | 103 (91.0-113)                                         |

IQR; interquartile range, BMI; body mass index, WHR; waist-hip-ratio, HC; hip circumference, WC; weight circumference

**Supplementary Figure 1 PCA plot of South African Zulu study and selected ethnicities from the 1000Genomes**

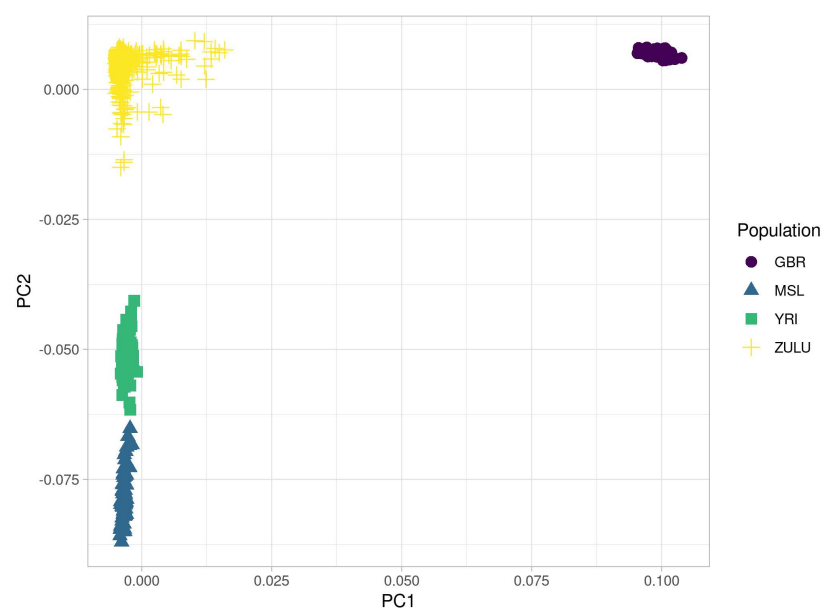

**Supplementary Figure 2.** Schematic diagram for the approach used to compare the predictive ability of the European, African-American and Multi-ethnic derived polygenic risk scores in Africa

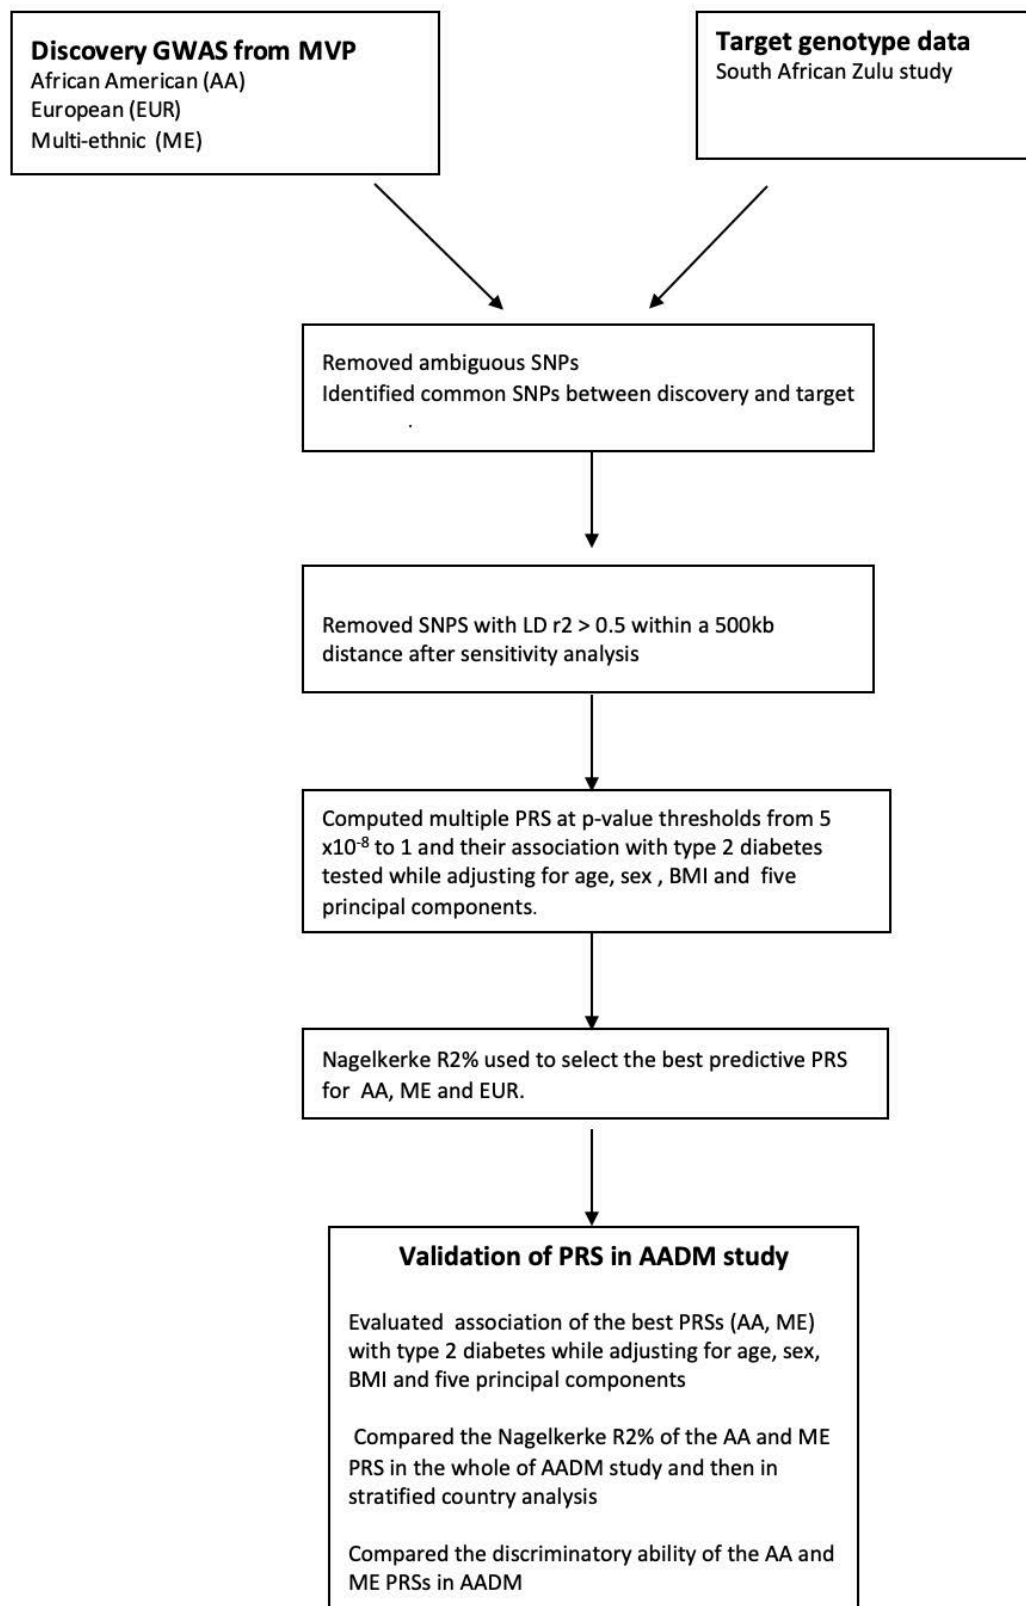

**Supplementary Figure 3.** Transferability and predictability of multiple African PRSs computed at varied P-value thresholds showing the best PRS which had the highest R2  
(A) Plot showing the p-values of the PRSs a measure of transferability (B) Plot showing the variance explained by the PRSs used as a proxy for predictability

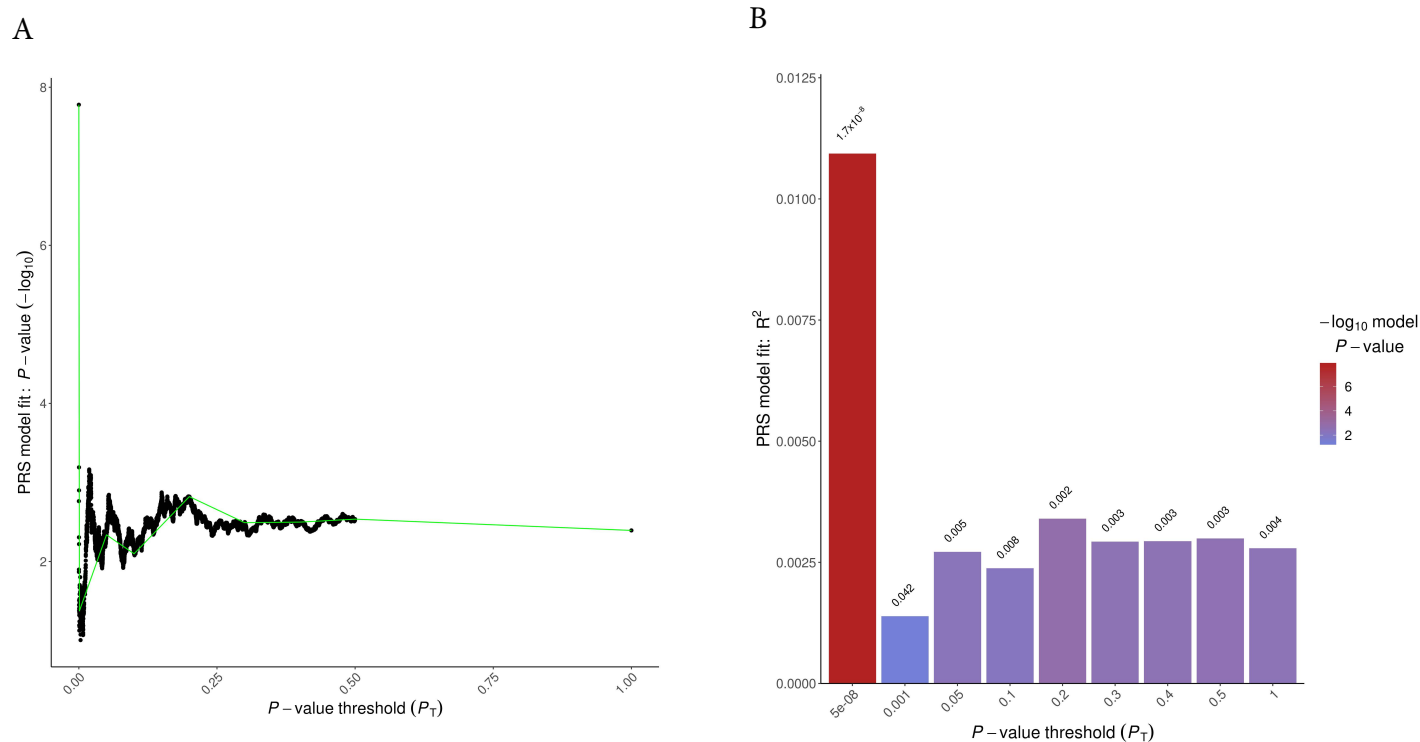

**Supplementary Figure 4.** Transferability and predictability of multiple European PRSs computed at varied P-value thresholds showing the best PRS which had the highest R2  
(A) Plot showing the p-values of the PRSs a measure of transferability (B) Plot showing the variance explained by the PRS's used as a proxy for predictability

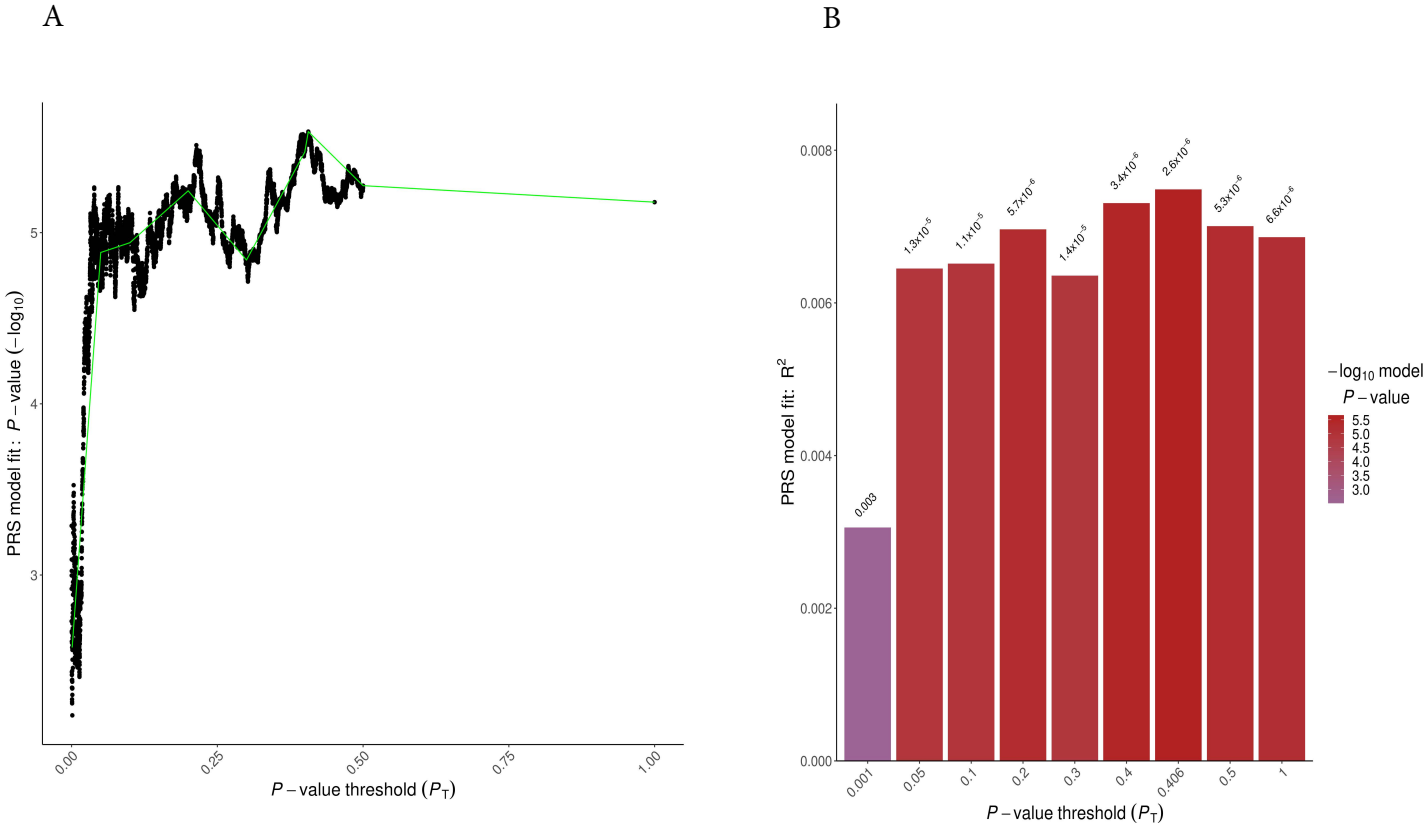

**Supplementary Figure 5.** Transferability and predictability of multiple Multi-ethnic PRSs computed at varied P-value thresholds showing the best PRS which had the highest R2  
(A) Plot showing the p-values of the PRSs a measure of transferability (B) Plot showing the variance explained by the PRS's used as a proxy for predictability

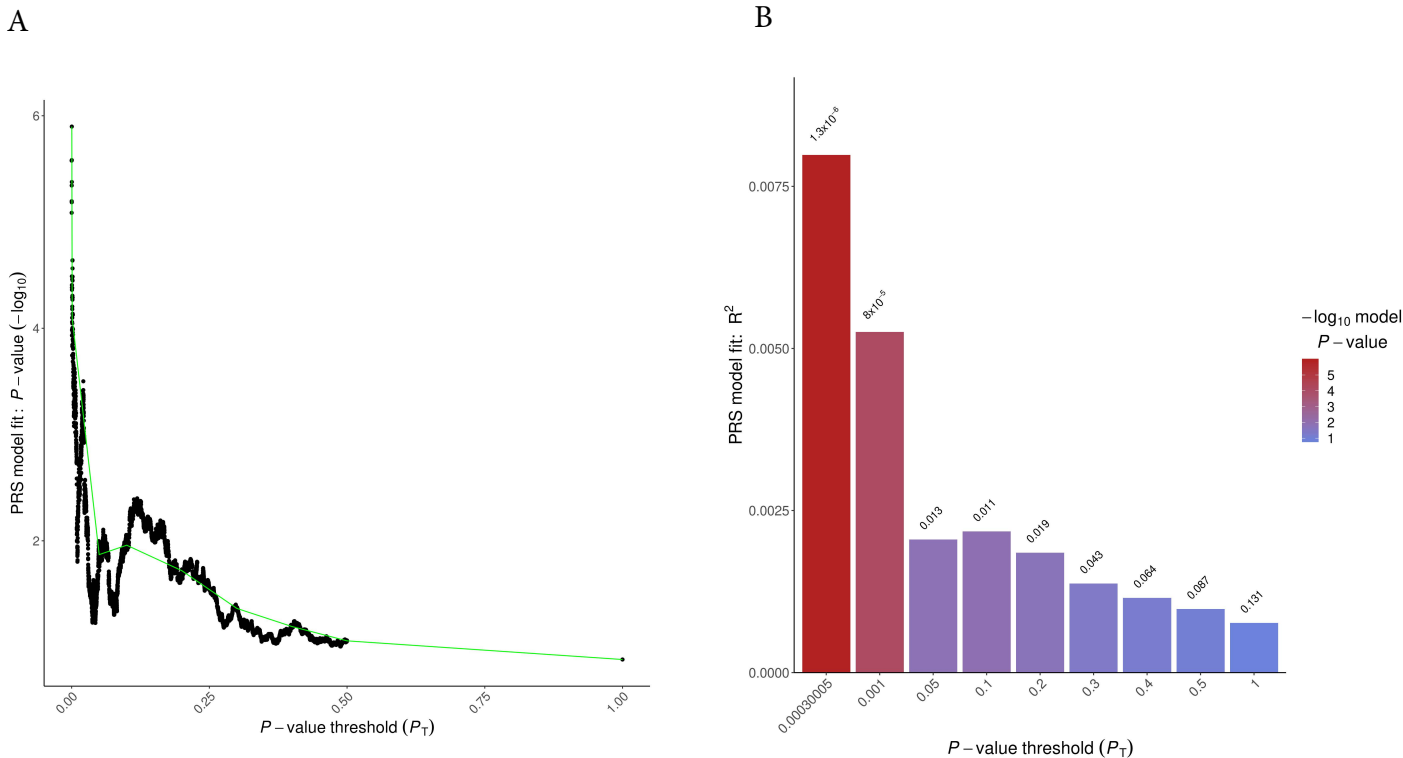

**Supplementary Figure 6.** Receiver operating curves illustrating the discriminatory ability of the Multi-ethnic polygenic risk scores with covariates (age, sex , BMI and five principal components) for type 2 diabetes in AADM study

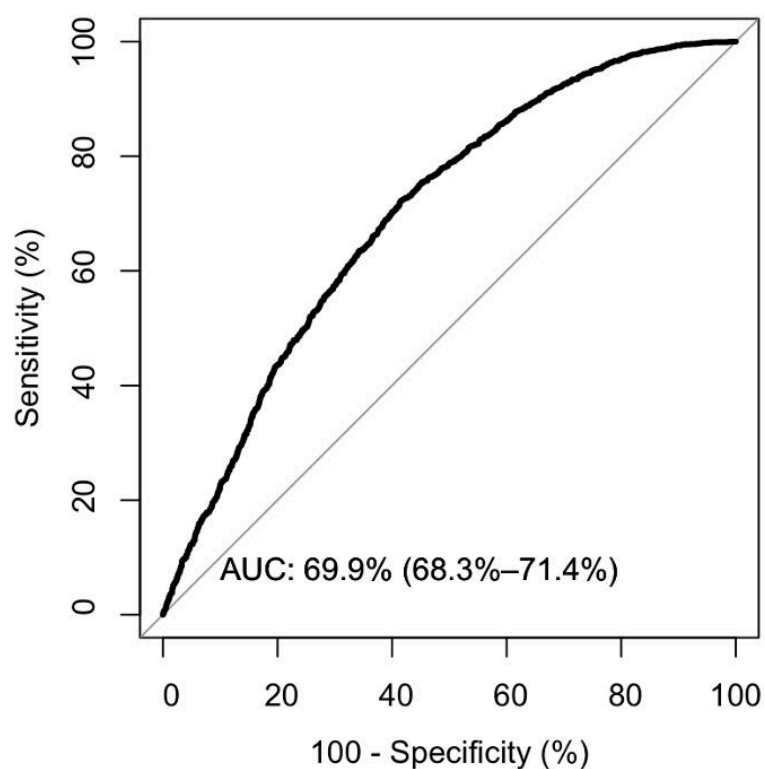

Supplement: Supplementary file 1 [file 31573796]
